# Supplementary material for: Catalytic dioxygen activation by Co(ii) complexes employing a coordinatively versatile ligand scaffold
Source: Royal Society of Chemistry journal article supplement (doi:10.1039/c0cc04671j), 2010-12-22
Supplement: c0cc04671j.pdf [file c0cc04671j.pdf]

## Supporting Information

For

### Catalytic Dioxygen Activation by Co(II) Complexes Employing a Versatile Ligand Scaffold

Savita K. Sharma, Philip S. May, Matthew B. Jones, Sheri Lense, Kenneth I. Hardcastle,  
and Cora E. MacBeth\*

*Department of Chemistry, Emory University, 1515 Dickey Drive, Atlanta, GA 30322*

| <b><u>Table of Contents</u></b>                                                                                                                                          | <b><u>Pages</u></b> |
|--------------------------------------------------------------------------------------------------------------------------------------------------------------------------|---------------------|
| <b>Synthesis and Characterization Details</b>                                                                                                                            |                     |
| A. General Considerations                                                                                                                                                | S2                  |
| B. Ligand Syntheses                                                                                                                                                      | S2                  |
| C. Complex Syntheses                                                                                                                                                     | S3                  |
| D. Catalytic Oxidation Procedures                                                                                                                                        | S4                  |
| <b>Figures</b>                                                                                                                                                           |                     |
| Figure S1. UV-Vis absorption data for (Et <sub>4</sub> N) <sub>2</sub> [ <b>1</b> ] and (Et <sub>4</sub> N) <sub>2</sub> [ <b>2</b> ] in CH <sub>2</sub> Cl <sub>2</sub> | S5                  |
| Figure S2. UV-Vis absorption data for (Et <sub>4</sub> N) <sub>2</sub> [ <b>1</b> ] and (Et <sub>4</sub> N) <sub>2</sub> [ <b>2</b> ] in DMF                             | S5                  |
| Figure S3. Cyclic voltammogram of (Et <sub>4</sub> N) <sub>2</sub> [ <b>2</b> ]                                                                                          | S6                  |
| Figure S4. Cyclic voltammogram of (Et <sub>4</sub> N) <sub>2</sub> [ <b>1</b> ]                                                                                          | S6                  |
| Figure S5. Cyclic voltammogram of oxidised (Et <sub>4</sub> N) <sub>2</sub> [ <b>1</b> ]                                                                                 | S7                  |
| Figure S6. Cyclic voltammogram of oxidised (Et <sub>4</sub> N) <sub>2</sub> [ <b>1</b> ] ( $E^1_{1/2}$ and $E^2_{1/2}$ )                                                 | S7                  |
| Figure S7. Charge vs. time plot from bulk electrolysis of (Et <sub>4</sub> N) <sub>2</sub> [ <b>1</b> ]                                                                  | S8                  |
| Figure S8. Overlay of UV-Vis absorption data for (Et <sub>4</sub> N)[ <b>1</b> ] and (Et <sub>4</sub> N) <sub>2</sub> [ <b>1</b> ]                                       | S8                  |
| Figure S9. Thermal ellipsoid diagram of (Et <sub>4</sub> N)[ <b>1</b> ] and selected metrical parameters                                                                 | S9                  |

## A. General Considerations

All manipulations were carried out using standard Schlenk techniques or conducted in an MBraun Labmaster 130 drybox under a nitrogen atmosphere. All reagents used were purchased from commercial vendors and used as received unless otherwise noted. Anhydrous solvents were purchased from Sigma-Aldrich and further purified by sparging with Ar gas followed by passage through activated alumina columns. Anhydrous  $^{16}\text{O}_2$  was purchased from NexAir and passed through a Drierite<sup>TM</sup> column before using.  $^{18}\text{O}_2$  (99%) was purchased from Icon Isotopes, New Jersey. Elemental analyses were performed by Midwest Microlab, LLC.  $^1\text{H}$ ,  $^{13}\text{C}$ , and  $^{31}\text{P}$  NMR spectra were recorded on Varian Mercury 300 and Inova 400 MHz spectrometers at ambient temperature.  $^1\text{H}$  and  $^{13}\text{C}$  chemical shifts were referenced to residual solvent peaks.  $^{31}\text{P}$  chemical shifts were referenced to phosphoric acid. Infrared spectra were recorded as KBr pellets on a Varian Scimitar 800 Series FT-IR spectrophotometer. UV-Visible absorption spectra were recorded on a Cary50 spectrophotometer using 1.0 cm quartz cuvettes. Solution-state magnetic moments were measured using Evans' method.<sup>1, 2</sup> Mass spectra were recorded in the Mass Spectrometry Center at Emory University on a JEOL JMS-SX102/SX102A/E mass spectrometer. X-ray diffraction studies were carried out in the X-ray Crystallography Laboratory at Emory University on a Bruker Smart 1000 CCD diffractometer. Cyclic voltammetry experiments were carried out using a CH Instruments (Austin, TX) Model 660C potentiostat. All experiments were conducted in  $\text{CH}_2\text{Cl}_2$  with 0.10 M tetrabutylammonium hexafluorophosphate as the supporting electrolyte. Electrochemical experiments were conducted in a three-component cell consisting of a Pt auxiliary electrode, a non-aqueous reference electrode ( $\text{Ag}/\text{AgNO}_3$ ), and either a glassy carbon (CV) or reticulated vitreous carbon (bulk electrolysis) working electrode. All electrochemical measurements are referenced and reported versus the ferrocene/ferrocenium couple.

## B. Ligand Synthesis

**Bis(2-nitrophenyl)amine** [ $\text{HN}(o\text{-PhNO}_2)_2$ ]. Prepared using a modified literature procedure.<sup>3</sup> A mixture of 2-nitroaniline (2.0 g, 14.1 mmol) and 1-fluoro-2-nitrobenzene (1.5 mL, 14.1 mmol) was stirred in dimethyl sulfoxide (DMSO, 40 mL) at room temperature.  $\text{KO}^t\text{Bu}$  (3.3 g, 29.0 mmol) was added slowly and the reaction stirred under  $\text{N}_2$  at room temperature for 24 h. The reaction mixture was then diluted with water (200 mL) and filtered to give a bright orange solid. The solid was recrystallized from MeOH (500 mL) and dried under vacuum to afford the product as a bright orange, crystalline solid (63%, 2.30 g).  $^1\text{H}$  NMR ( $\delta$ ,  $\text{CDCl}_3$ , 300 MHz): 11.02 (s, 1H), 8.21 (dd, 2H,  $J = 1.5$ ), 7.56 (m, 4H), 7.10 (td, 2H,  $J = 1.8$  Hz,  $J = 1.5$  Hz).  $^{13}\text{C}$  NMR ( $\delta$ ,  $\text{CDCl}_3$ , 75.5 MHz): 137.40, 134.30, 127.01, 121.32, 119.20. HRMS(ESI):  $\text{C}_{12}\text{H}_9\text{N}_3\text{O}_4$   $m/z$  Calcd. 259.0593, Found 260.06584 [ $\text{M}+1$ ]<sup>+</sup>. FTIR (KBr,  $\text{cm}^{-1}$ ):  $\nu(\text{NO}_2)$  1514, 1334,  $\nu(\text{NH})$  3303. UV-vis ( $\text{CH}_2\text{Cl}_2$ )  $\lambda_{\text{max}}$ , nm ( $\epsilon$ ,  $\text{M}^{-1} \text{cm}^{-1}$ ): 430 (14100), 268 (35700).

**Bis(2-aminophenyl)amine** [ $\text{HN}(o\text{-PhNH}_2)_2$ ]. Prepared using a modified literature procedure.<sup>4</sup> To a THF (50.0 mL) solution of  $\text{HN}(o\text{-PhNO}_2)_2$  (2.0 g, 7.7 mmol) was added 5 wt.% Pd/C (1.0 g, 0.5 mmol, 6 mol%). The reaction mixture was placed in a pressure-safe reaction vessel and shaken under  $\text{H}_2$  at 50 psi for 45 min. The reaction mixture was filtered through a pad of Celite, and the filtrate was concentrated in vacuo to obtain a thick, colorless oil. Crystalline product can be obtained by layering a concentrated ether solution of the compound with hexanes (1.38 g, 90%).  $^1\text{H}$  NMR ( $\delta$ ,  $\text{CDCl}_3$ , 300 MHz): 6.93 (m, 4H, ArH), 6.79 (m, 4H, ArH), 5.05 (s, 1H, NH), 3.64 (s, 4H, NH).  $^{13}\text{C}$  NMR ( $\delta$ ,  $\text{CDCl}_3$ , 75.5 MHz): 138.56, 131.21, 124.12, 122.61, 120.84, 118.78. HRMS(ESI):  $\text{C}_{12}\text{H}_{13}\text{N}_3$   $m/z$  Calcd. 199.11095 Found 200.11751 [ $\text{M}+1$ ]<sup>+</sup>. FTIR (KBr,  $\text{cm}^{-1}$ ):  $\nu(\text{NH})$  3413, 3375, and 3344.

**2,2'-Bis(isobutyrylamido)diphenylamine** ( $\text{HN}(o\text{-PhNHC(O)}^i\text{Pr})_2$ ). A suspension of  $\text{HN}(o\text{-PhNH}_2)_2$  (1.32 g, 6.6 mmol) in dichloromethane ( $\text{CH}_2\text{Cl}_2$ , 50 mL) was lowered to 0 °C under an atmosphere of  $\text{N}_2$ . Triethylamine (2.02 mL, 14.5 mmol) was then added, followed by isobutyryl chloride (1.53 mL, 14.5 mmol). The mixture stirred at 0 °C for 1 hour. The reaction mixture was slowly warmed to room temperature and stirred for an additional 20 hours. The resulting pale brown solution was extracted with a saturated aqueous  $\text{NaHCO}_3$  (3 x 30 mL) solution. The organic layers were combined, dried over magnesium sulfate, filtered, and concentrated in vacuo. The crude solid was recrystallised by layering

hexanes onto a concentrated  $\text{CH}_2\text{Cl}_2$  solution of the product (1.78 g, 80%).  $^1\text{H}$  NMR ( $\delta$ ,  $\text{CDCl}_3$ , 300 MHz): 7.83 (s, 2H, NH(CO)), 7.67 (d, 2H,  $J = 1.6$  Hz, ArH), 7.04 (m, 4H, ArH), 6.88 (d, 2H,  $J = 1.2$  Hz, ArH), 5.75 (s, 1H, NH), 2.58 (q, 2H,  $J = 6.8$  Hz, CH), 1.16 (d, 12H,  $J = 7.2$  Hz,  $\text{CH}_3$ ).  $^{13}\text{C}$  NMR ( $\delta$ ,  $\text{CDCl}_3$ , 75.5 MHz): 176.48, 136.02, 129.26, 126.27, 124.18, 123.0, 121.11, 36.20, 19.76. HRESI-MS:  $\text{C}_{20}\text{H}_{25}\text{N}_3\text{O}_2$   $m/z$  Calcd. 339.19468 Found 340.20150  $[\text{M}+1]^+$ . FTIR (KBr,  $\text{cm}^{-1}$ ):  $\nu(\text{NH}_{\text{amide}})$  3230,  $\nu(\text{NH}_{\text{amine}})$  3367,  $\nu(\text{CO})$  1660.

## C. Complex Syntheses

### Synthesis of $(\text{Et}_4\text{N})_2[\mathbf{1}]$

To a solution of  $\text{HN}(o\text{-PhNHC(O)}^i\text{Pr})_2$  (114.0 mg, 0.34 mmol) in DMF, (10 mL) was added potassium hydride (29.67 mg, 0.74 mmol). When gas evolution ceased,  $\text{CoBr}_2$  (36.77 mg, 0.17 mmol) was added as a solid. When the reaction mixture became homogenous, tetraethylammonium bromide (70.67 mg, 0.34 mmol) was added to the red solution. After stirring for 3 h, the DMF was removed under high vacuum and the resulting solid was dissolved in  $\text{CH}_3\text{CN}$  (15 mL), filtered through a medium porosity frit, and the filtrate was concentrated to dryness. Bulk recrystallization was obtained by diffusing diethylether into a concentrated  $\text{CH}_2\text{Cl}_2$  solution containing the product. Red, X-ray quality crystals were obtained by slow diffusion of diethyl ether into a concentrated DMF solution of  $(\text{Et}_4\text{N})_2[\mathbf{1}]$  (120 mg, 72%).  $^1\text{H}$  NMR ( $\delta$ ,  $\text{CD}_3\text{CN}$ , 400 MHz): -70.03 (s), -63.80 (s), -46.48 (s), -37.23 (s), -16.31 (s), -14.7 (s), -4.11 (s), 1.32 (s), 3.60 (s), 4.90 (s), 6.36 (s), 8.56 (s), 9.22 (s), 12.39 (br), 17.67 (br), 23.44 (s), 27.01 (s), 56.50 (s), 60.54 (s). FTIR (KBr,  $\text{cm}^{-1}$ ):  $\nu(\text{NH})$  3388,  $\nu(\text{CO})$  1681. Anal. Calcd (found) for  $(\text{Et}_4\text{N})_2[\mathbf{1}]\cdot\text{CH}_2\text{Cl}_2$ : C, 63.44 (63.27); H, 8.22 (8.50); N, 10.38(10.02).  $\mu_{\text{eff}} = 4.37 \mu_{\text{B}}$  (Evans Method,  $\text{CD}_2\text{Cl}_2$ , 298K).  $\lambda_{\text{max}}$ , nm ( $\epsilon$ ,  $\text{M}^{-1}\text{cm}^{-1}$ ) (DMF): 634 (sh), 569 (640), 535 (sh);  $\lambda_{\text{max}}$ , nm ( $\epsilon$ ,  $\text{M}^{-1}\text{cm}^{-1}$ ) ( $\text{CH}_2\text{Cl}_2$ ): 636 (sh), 573 (570), 534 (sh);  $\lambda_{\text{max}}$ , nm (solid, silicon oil): 211, 255, 360, 573.

### Synthesis of $(\text{Et}_4\text{N})_2[\mathbf{2}]$

To a solution of  $\text{HN}(o\text{-PhNHC(O)}^i\text{Pr})_2$  (99.3 mg, 0.29 mmol) in dry dimethylformamide (DMF, 10 mL) was added potassium hydride (41.11 mg, 1.0 mmol). When gas evolution ceased,  $\text{CoBr}_2$  (64.06 mg, 0.29 mmol) was added as a solid and the mixture stirred for 1 h. Tetraethylammonium bromide (61.55 mg, 0.29 mmol) was then added to the deep green solution. After stirring for 3 h, DMF was removed under vacuum and the resulting solid was dissolved in  $\text{CH}_3\text{CN}$  (15 mL), filtered through a medium porosity frit, and the filtrate was concentrated to dryness. Dark green, X-ray quality crystals were obtained by slow diffusion of diethyl ether into a concentrated DMF solution of the product (70%, 108 mg).  $^1\text{H}$  NMR ( $\delta$ ,  $\text{CD}_2\text{Cl}_2$ , 400 MHz): -46.28 (s), -40.05 (s), -1.12 (s), 0.71 (s), 10.92 (s), 25.99 (s), 28.64 (s), 65.20 (s). FTIR (KBr,  $\text{cm}^{-1}$ ):  $\nu(\text{CO})$  1592. Anal. Calcd (found) for  $(\text{Et}_4\text{N})_2[\mathbf{2}]$ : C, 63.98 (63.64); H, 8.05 (7.95); N, 10.66 (11.01).  $\mu_{\text{eff}} = 4.73 \mu_{\text{B}}$  (Evans Method,  $\text{CD}_2\text{Cl}_2$ , 298K).  $\lambda_{\text{max}}$ , nm ( $\epsilon$ ,  $\text{M}^{-1}\text{cm}^{-1}$ ) (DMF): 600 (770), 926 (133);  $\lambda_{\text{max}}$ , nm ( $\epsilon$ ,  $\text{M}^{-1}\text{cm}^{-1}$ ) ( $\text{CH}_2\text{Cl}_2$ ): 609 (749), 926 (106);  $\lambda_{\text{max}}$ , nm (solid, silicon oil): 253, 343, 455 (sh), 644.

### Synthesis of $(\text{Et}_4\text{N})[\mathbf{1}]$

To a red solution of  $(\text{Et}_4\text{N})_2[\mathbf{1}]$  (237.6 mg, 0.239 mmol) in acetonitrile ( $\text{CH}_3\text{CN}$ , 10 mL) was added ferrocenium tetrafluoroborate ( $\text{FcBF}_4$ ) (65.23 mg, 0.239 mmol) as an  $\text{CH}_3\text{CN}$  solution (3 mL). After stirring for 12 h, the solvent was removed under vacuum, and the resulting solid was dissolved in THF and filtered to remove  $\text{Et}_4\text{NBF}_4$ . The deep blue filtrate was then concentrated to dryness. The deep blue solid that resulted was washed with hexanes (3 x 5 mL) to remove ferrocene, and the crude solid was collected on a frit. Fine blue crystals can be obtained by layering hexanes onto a  $\text{CH}_2\text{Cl}_2$  solution of the product (149 mg, 72%).  $^1\text{H}$  NMR ( $\delta$ ,  $\text{CD}_3\text{CN}$ , 400 MHz): -39.08 (s), -37.15 (d), -26.99 (s), -25.34 (s), -21.74 (s), -18.61 (s), -11.74 (s), -9.59 (s), -9.10 (br), -6.46(s), -2.65 (s), 1.17 (s), 3.16 (s), 5.74 (s), 6.93 (t), 7.31 (s), 7.57 (s), 7.81 (s), 10.16 (br), 12.0 (s), 13.11 (s), 14.27 (s), 16.80 (s), 22.71 (s), 36.98 (s), 38.03 (s), 42.05 (s), 51.23 (s), 54.38 (d). FTIR (KBr,  $\text{cm}^{-1}$ ):  $\nu(\text{NH})$  3378.  $\lambda_{\text{max}}$ ( $\epsilon$ ,  $\text{M}^{-1}\text{cm}^{-1}$ ) ( $\text{CH}_2\text{Cl}_2$ ): 300 (25540), 455 (55030), 582 (6770), 805 (4230). HRESI-MS: for  $[\mathbf{1}]^+$  Calcd ( $m/z$ ): 733.29125, Found 733.29180.  $\text{Et}_4\text{N}[\mathbf{1}]$ . Anal. Calcd (found) for  $(\text{Et}_4\text{N})[\mathbf{1}]\cdot 0.25\text{CH}_2\text{Cl}_2$ : C, 65.46 (65.11); H, 7.57 (7.53); N, 11.08 (10.87).

## D. Catalytic Oxidation Procedures

Typical procedure for  $(\text{Et}_4\text{N})_2[\mathbf{1}]$ : Under an inert atmosphere, a 25 mL round bottom flask was charged with a stir bar, triphenylphosphine (0.53 g, 2.0 mmol),  $(\text{Et}_4\text{N})_2[\mathbf{1}]$  (0.02 g, 0.020 mmol), and 10 mL of  $\text{CH}_3\text{CN}$ . The mixture was stirred until homogeneous (~3 min) and then the flask was fitted with a septum and removed from the drybox. While stirring at room temperature, a constant slow purge of  $\text{O}_2$  (1 atm) was then introduced to flask by connecting it, via 18-gauge needles inserted through the septum, to an  $\text{O}_2$  line and to a mineral oil gas bubbler. Reactions were monitored by GC (traces compared to authentic samples of  $\text{PPh}_3$  and  $\text{OPPh}_3$ ). After 2 hours, 69% of the  $\text{PPh}_3$  had been converted to  $\text{OPPh}_3$  (1.38 mmol, 0.39 g). Isolate yield of  $\text{OPPh}_3$  confirmed by GC and  $^{31}\text{P}$  NMR. Catalytic oxidations were run in triplicate and conversion numbers (yields of  $\text{OPPh}_3$ ) in good agreement ( $\pm 3\%$ ).

Typical procedure for  $(\text{Et}_4\text{N})_2[\mathbf{2}]$ : Under an inert atmosphere, a 25 mL round bottom flask was charged with a stir bar, triphenylphosphine (0.498 g, 1.9 mmol),  $(\text{Et}_4\text{N})_2[\mathbf{2}]$  (0.02 g, 0.019 mmol), and 12 mL of  $\text{CH}_3\text{CN}$ . The mixture was stirred until homogeneous (~3 min) and then the flask was fitted with a septum and removed from the drybox. While stirring at room temperature, a constant slow purge of  $\text{O}_2$  (1 atm) was then introduced to flask by connecting it, via 18-gauge needles inserted through the septum, to an  $\text{O}_2$  line and to a mineral oil gas bubbler. Reactions were monitored by GC (traces compared to authentic samples of  $\text{PPh}_3$  and  $\text{OPPh}_3$ ). After 2 hours, 95% of the  $\text{PPh}_3$  had been converted to  $\text{OPPh}_3$  (0.50 g, 1.81 mmol). Isolated yields of  $\text{OPPh}_3$  confirmed by GC and  $^{31}\text{P}$  NMR. Catalytic oxidations were run in triplicate. Catalytic oxidations were run in triplicate and conversion numbers (yields of  $\text{OPPh}_3$ ) in good agreement ( $\pm 3\%$ ).

Reactions with  $^{18}\text{O}_2$ : Typical experiment: Under an inert atmosphere, a 10 mL round bottom flask was charged with a stir bar, triphenylphosphine (0.030 g, 0.10 mmol),  $(\text{Et}_4\text{N})_2[\mathbf{2}]$  (0.0107 g, 0.010 mmol), and 5 mL of  $\text{CH}_3\text{CN}$ . The mixture was stirred until homogeneous (~3 min) and then the flask was fitted with a septum and removed from the drybox. While stirring,  $^{18}\text{O}_2$  was then introduced to flask via syringe. Incorporation of  $^{18}\text{O}$  from the  $^{18}\text{O}_2$  into the oxidized product was confirmed by mass spectrometry.

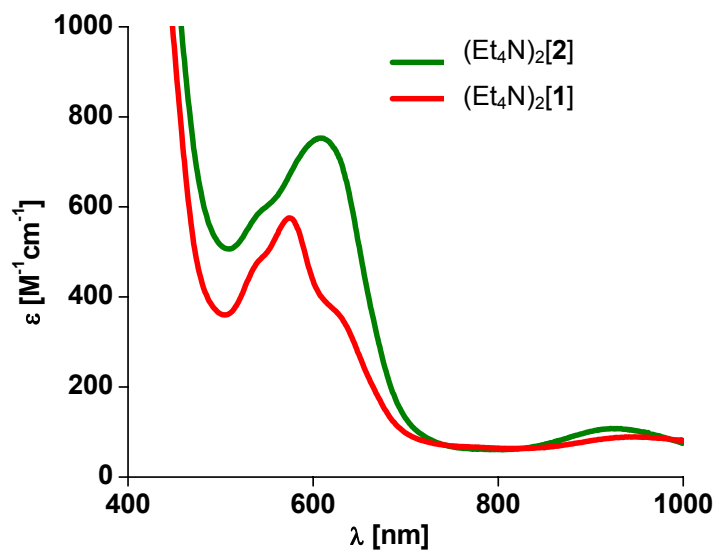

**Figure S1:** UV-Visible absorption spectra of (Et<sub>4</sub>N)<sub>2</sub>[2] (green) and (Et<sub>4</sub>N)<sub>2</sub>[1] (red) in CH<sub>2</sub>Cl<sub>2</sub>.

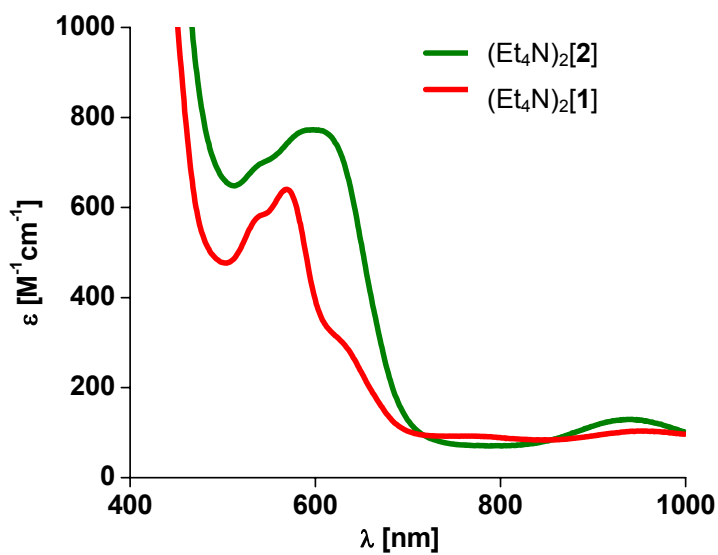

**Figure S2:** UV-Visible absorption spectra of (Et<sub>4</sub>N)<sub>2</sub>[2] (green) and (Et<sub>4</sub>N)<sub>2</sub>[1] (red) in DMF.

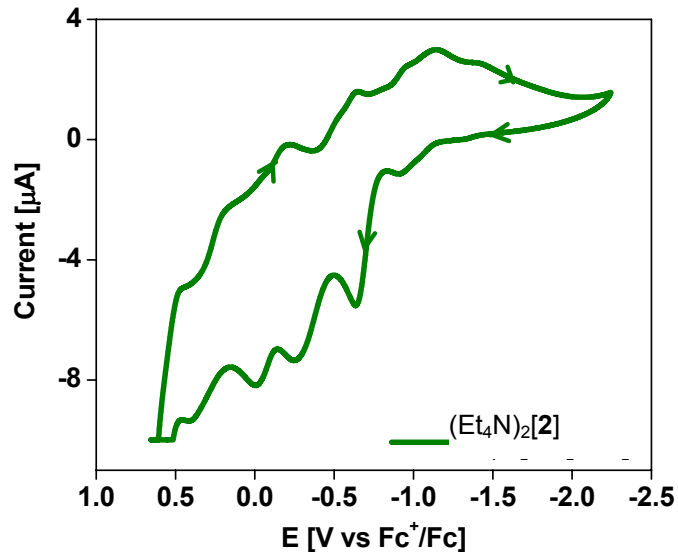

**Figure S3:** Cyclic voltammogram of  $(\text{Et}_4\text{N})_2[2]$  recorded in  $\text{CH}_2\text{Cl}_2$  (0.10 M  $n\text{Bu}_4\text{NPF}_6$ ) at room temperature at 100 mV/s.

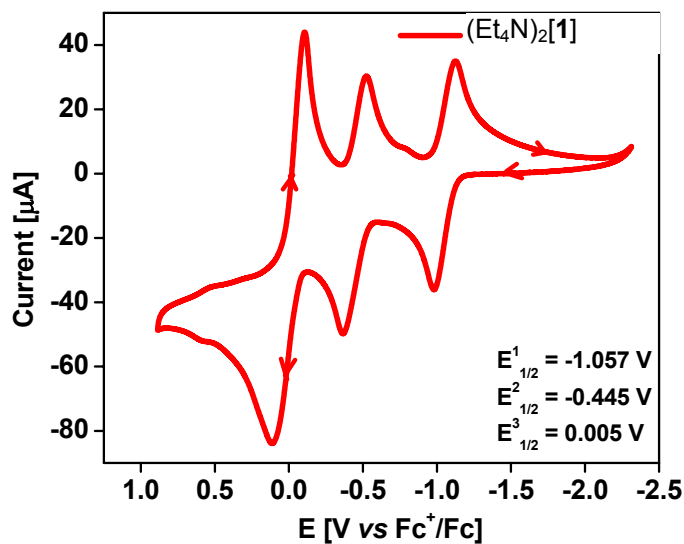

**Figure S4:** Cyclic voltammogram of  $(\text{Et}_4\text{N})_2[1]$  recorded in  $\text{CH}_2\text{Cl}_2$  (0.10 M  $n\text{Bu}_4\text{NPF}_6$ ) at room temperature at 100 mV/s ( $\Delta E_p$  for  $E^1_{1/2}$ ,  $E^2_{1/2}$  and  $E^3_{1/2}$  are 143.5 mV, 170 mV and 216 mV;  $i_p^a/i_p^c$  are 1.1, 1.3 and 0.86, respectively).

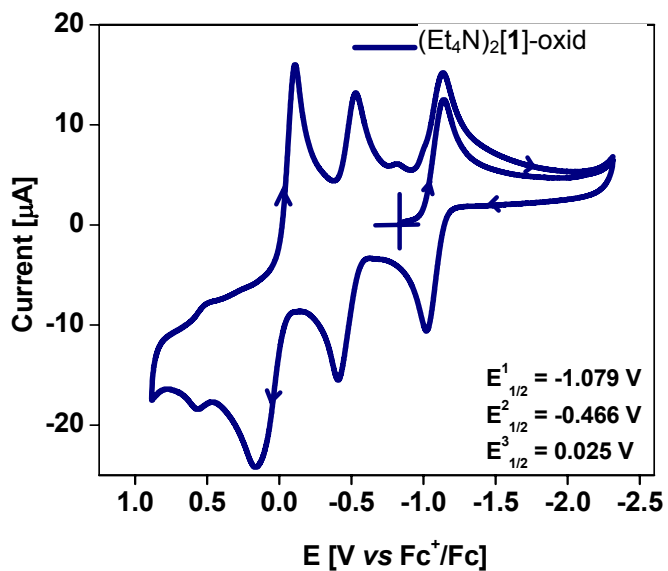

**Figure S5:** Cyclic voltammogram of electrochemically oxidised (Et<sub>4</sub>N)<sub>2</sub>[1] after first oxidation in CH<sub>2</sub>Cl<sub>2</sub> (0.10 M <sup>t</sup>Bu<sub>4</sub>NPF<sub>6</sub>) at 100 mV/s.

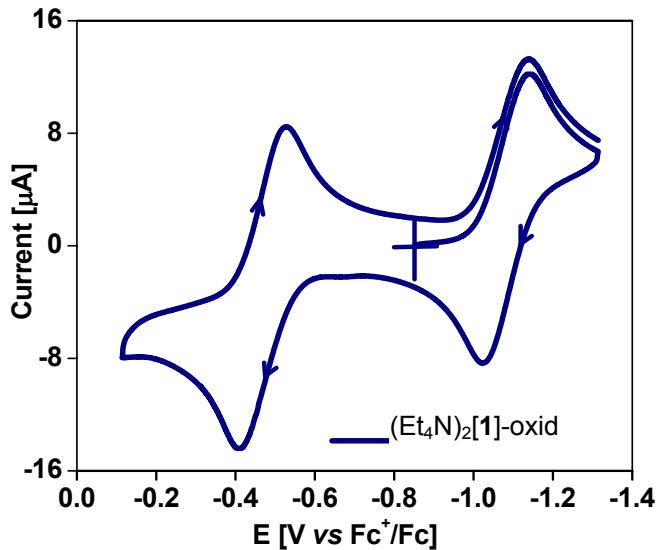

**Figure S6:** Cyclic voltammogram of electrochemically oxidised (Et<sub>4</sub>N)<sub>2</sub>[1] after first oxidation in CH<sub>2</sub>Cl<sub>2</sub> (0.10 M <sup>t</sup>Bu<sub>4</sub>NPF<sub>6</sub>) at 100mV/s.

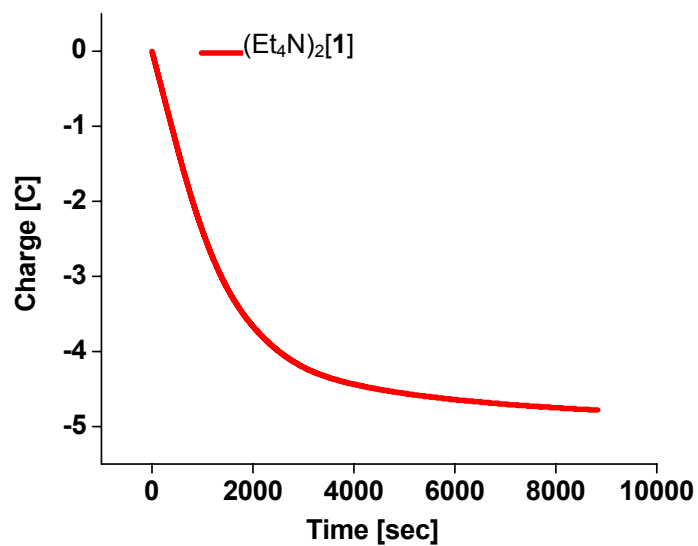

**Figure S7:** Charge vs. time plot for bulk electrolysis of  $(\text{Et}_4\text{N})_2[1]$  in  $\text{CH}_2\text{Cl}_2$  at room temperature.

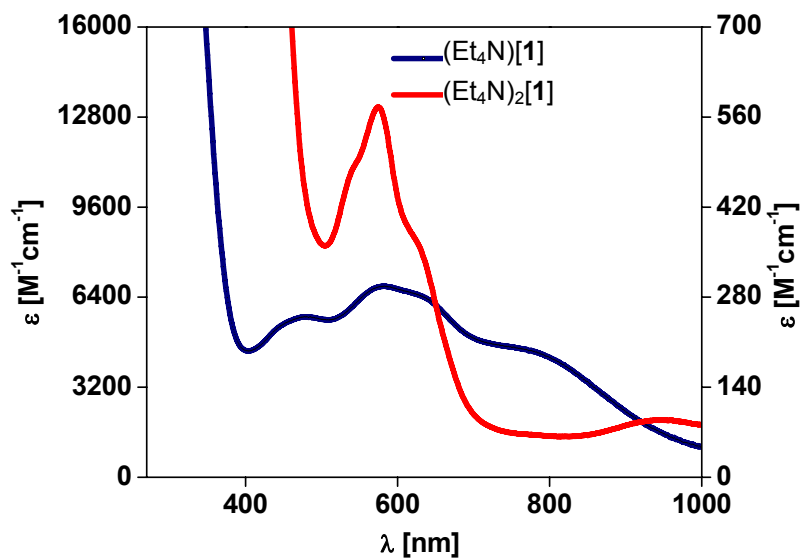

**Figure S8:** Overlay of UV-Visible absorption spectra of  $(\text{Et}_4\text{N})[1]$  (blue) and  $(\text{Et}_4\text{N})_2[1]$  (red) in  $\text{CH}_2\text{Cl}_2$ .



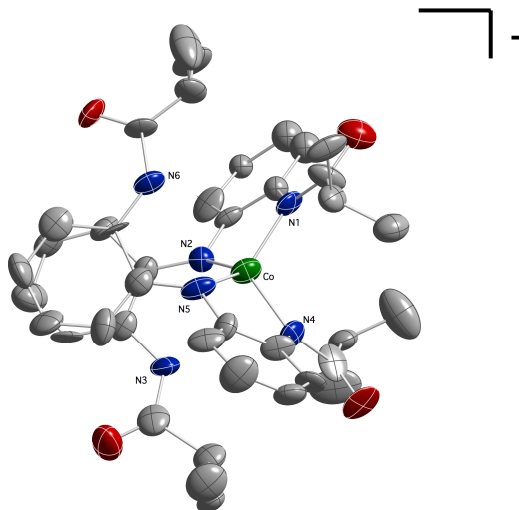

**Figure S9.** Thermal ellipsoid diagram of (Et<sub>4</sub>N)[**1**] drawn at 50% probability. Hydrogen atoms, tetraethylammonium counter cation, and solvent (CH<sub>2</sub>Cl<sub>2</sub>) have been removed for clarity. Selected bond distances (Å): Co–N1 1.933(14), Co–N2 1.943(14), Co–N4 1.933(13), Co–N5 1.923(15) and angles (°): N1–Co–N5 132.7(6), N1–Co–N2 87.3(6), N5–Co–N4 85.1(6), N1–Co–N4 114.6(4) N5–Co–N2 111.7(5) N4–Co–N2 131.8(6).<sup>5</sup>

#### **References & Notes.**

1. Evans, D. F., *Journal of the Chemical Society* **1959**, 2003-2005.
2. Sur, S. K., *Journal of Magnetic Resonance (1969-1992)* **1989**, 82, (1), 169-173.
3. Gorvin, J. H., *J. Chem. Soc. Perkin Trans. 1* **1988**, 6, 1331-1335.
4. Black, D. S.; Rothnie, N. E., *Australian Journal of Chemistry* **1983**, 36, (6), 1141-1147.
5. Crystal data for (Et<sub>4</sub>N)[**1**]: C<sub>49.47</sub> H<sub>68.94</sub> Cl<sub>2.94</sub> CoN<sub>7</sub>O<sub>4</sub>, *M* = 988.85, 0.29 x 0.18 x 0.07 mm<sup>3</sup>, Triclinic, space group *P*-1, *a* = 12.264(10) Å, *b* = 14.280(12) Å, *c* = 15.642(13), *V* = 2593(4), *Z* = 2,  $\rho$  = 1.266 g cm<sup>-3</sup>,  $\mu$  = 531 mm<sup>-1</sup>, *F*(000) = 1047, *T* = 173(2) K, *R*(*F*<sup>2</sup> > 2 $\sigma$ ) = 0.1377, *wR*<sub>2</sub> = 0.2424, 9133 independent reflections, [ $\theta$ <sub>range</sub> = 1.34 – 25.0°] and 560 parameters, GOF on *F*<sup>2</sup> = 1.096.
